# Supplementary material
Source: PubMed Central journal article supplement (PMC1885627)

Level of 20-Hz activity, mean of 13 subjects  
[individual head position not taken into account]  
time from -3 s to 3 s

- Own Action
- Observation
- Drum Sound

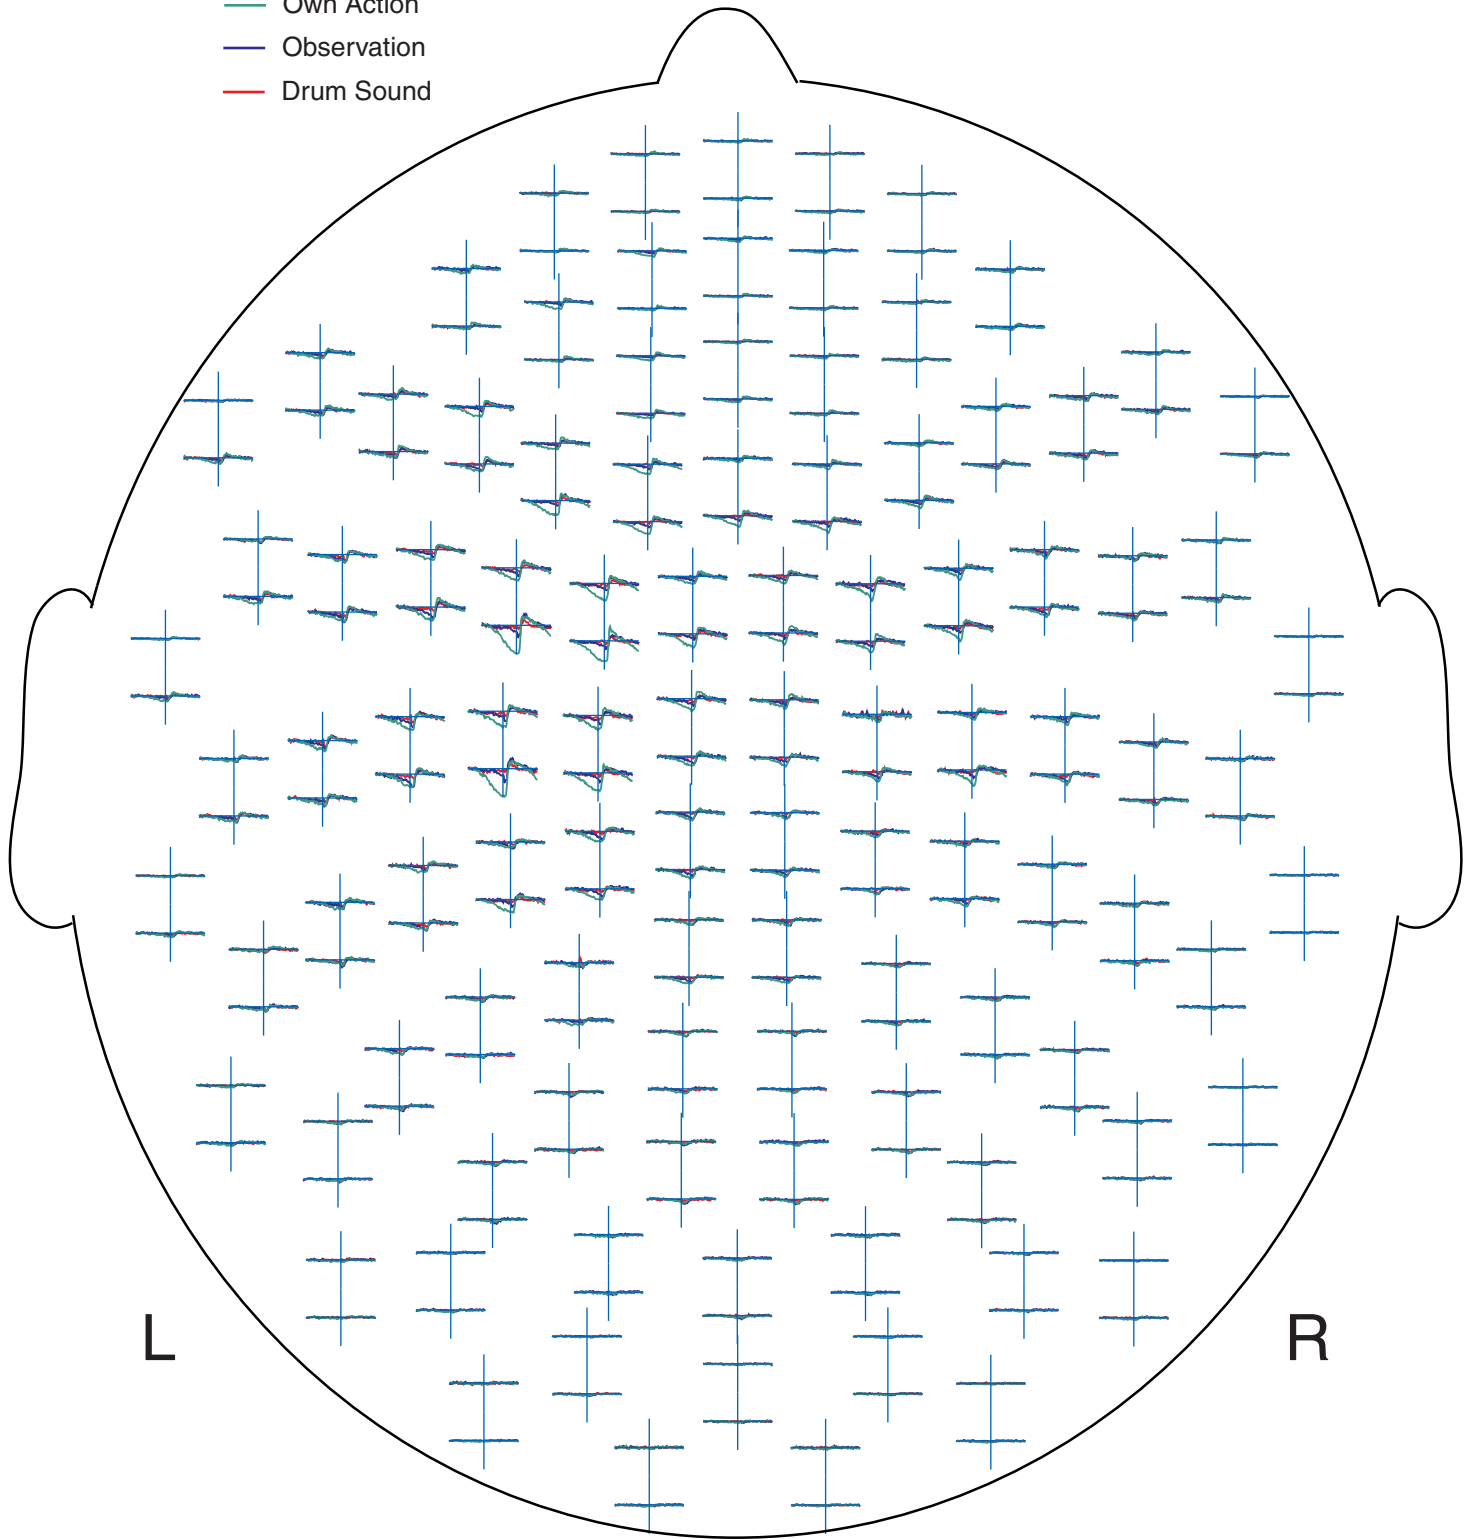

Level of 10-Hz activity, mean of 13 subjects  
[individual head position not taken into account]  
time from -3 s to 3 s

- Own Action
- Observation
- Drum Sound

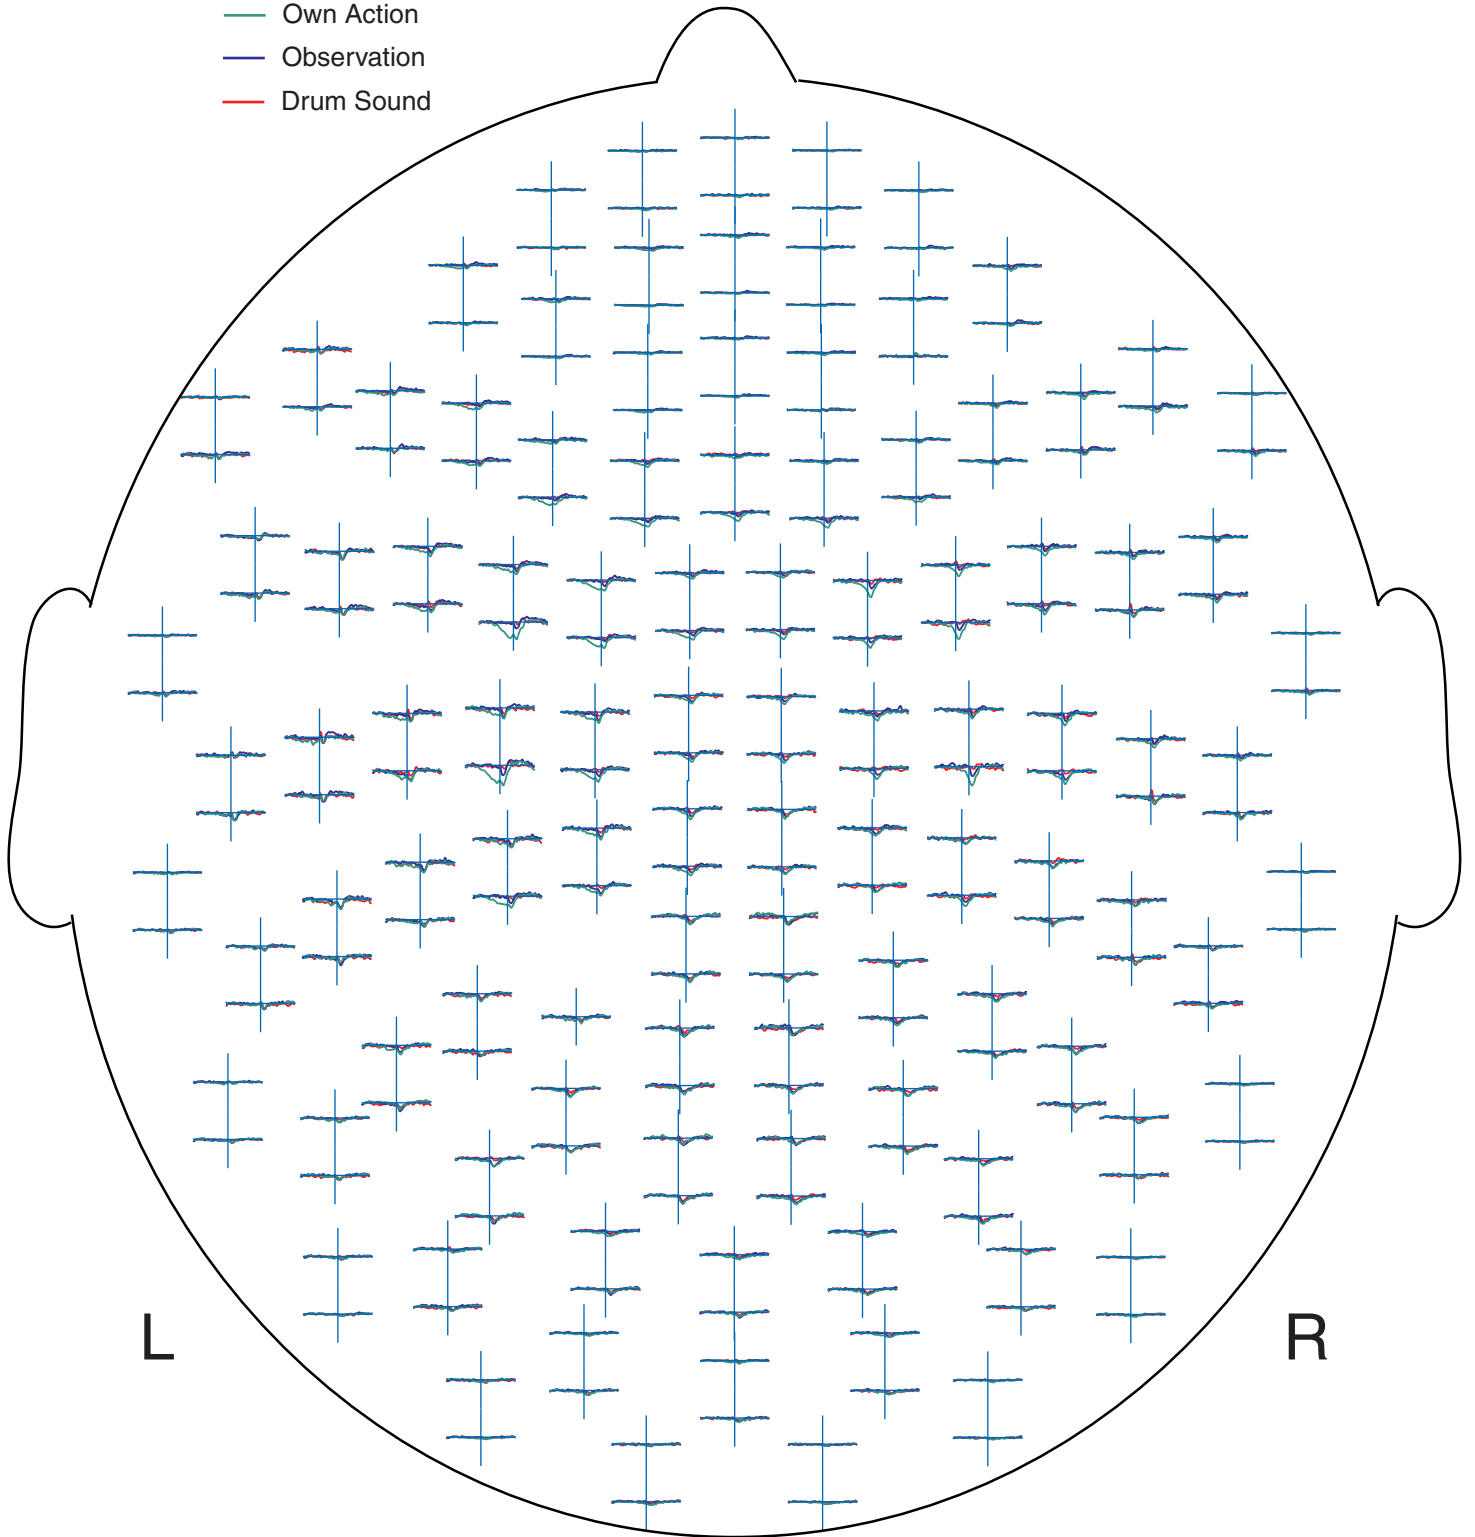

Supplement: pnas_0702453104_1.pdf [file pnas_0702453104_1.pdf]
